# Supplementary material for: Serotype-Dependent Effects on the Dynamics of Pneumococcal Colonization and Implications for Transmission
Source: PubMed Central journal article supplement (PMC9040870; doi:10.1128/mbio.00158-22), 2022-03-15

# S1.

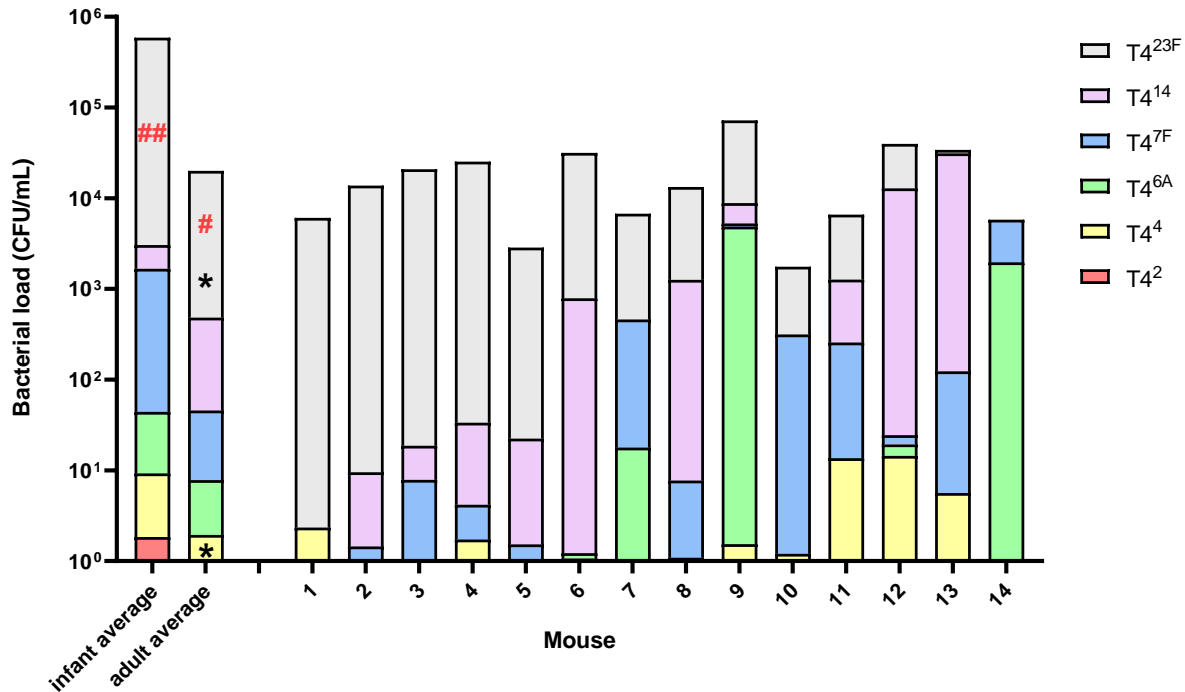

Supplement: mbio.00158-22-sf001.pdf [file mbio.00158-22-sf001.pdf]
